# Supplementary material for: Zinc(ii) and cadmium(ii) coordination polymers mediated by rationally designed symmetrical/asymmetrical V-shaped heterocyclic aromatic ligands exhibiting different supramolecular architectures
Source: Royal Society of Chemistry journal article supplement (doi:10.1039/c1ce05516j), 2011-01-01
Supplement: c1ce05516j.pdf [file c1ce05516j.pdf]

# Zinc(II) and cadmium(II) coordination polymers mediated by rationally designed symmetrical/asymmetrical V-shaped heterocyclic aromatic ligands exhibiting different supramolecular architectures

Shu-Jun Fu, Li Wang, Tao Tao, Bin Hu, Wei Huang, Xiao-Zeng You

State Key Laboratory of Coordination Chemistry, Nanjing National Laboratory of Microstructures, School of Chemistry and Chemical Engineering, Nanjing University, Nanjing 210093, P. R. China

## Supporting Information:

**Table SI1. Intermolecular Hydrogen Bonding Parameters (Å, °) in Compounds Lsym, L1 and 1-4.**

| D-H...A      | D-H  | H...A | D...A      | ∠DHA | Symmetry code           |
|--------------|------|-------|------------|------|-------------------------|
| <b>Lsym</b>  |      |       |            |      |                         |
| C1-H1...N2   | 0.93 | 2.47  | 3.3637(19) | 161  | -1+y, x, -z             |
| C5-H5...N2   | 0.93 | 2.55  | 3.4630(18) | 166  | -x+y, 1-x, 1/3+z        |
| <b>L1</b>    |      |       |            |      |                         |
| C4-H4...N2   | 0.93 | 2.43  | 3.315(10)  | 158  | 1+x, y, z               |
| C5-H5...N2   | 0.93 | 2.58  | 3.396(9)   | 147  | 1-x, 1-y, -z            |
| <b>1</b>     |      |       |            |      |                         |
| C1-H1...O2   | 0.93 | 2.52  | 3.405(4)   | 159  | y, -x+y, -z             |
| C1-H1...O3   | 0.93 | 2.58  | 3.294(6)   | 134  | y, -x+y, -z             |
| C4-H4...O3   | 0.93 | 2.45  | 3.280(6)   | 149  | 1-x+y, 1-x, z           |
| C11-H11...O2 | 0.93 | 2.51  | 3.376(5)   | 154  | 5/3-x, 4/3-y, 1/3-z     |
| C12-H12...O4 | 0.93 | 2.37  | 3.267(5)   | 162  | 2/3-x+y, -2/3+y, -1/6+z |
| <b>2</b>     |      |       |            |      |                         |
| C10-H10...N1 | 0.93 | 2.61  | 3.273(3)   | 128  | x, -1+y, z              |
| C2-H2...Cl1  | 0.93 | 2.79  | 3.584(2)   | 145  | 2-x, -1/2+y, 1/2-z      |
| C5-H5...Cl1  | 0.93 | 2.73  | 3.585(2)   | 154  | -1+x, y, z              |

|              |      |      |          |     |                    |
|--------------|------|------|----------|-----|--------------------|
| C9–H9···Cl1  | 0.93 | 2.77 | 3.580(2) | 146 | -1+x, -1+y, z      |
| <b>3</b>     |      |      |          |     |                    |
| O2–H2A···O3  | 0.82 | 2.12 | 2.84(1)  | 147 | x, 1/2-y, -1/2+z   |
| O2–H2A···O5  | 0.82 | 2.52 | 3.260(3) | 150 | x, 1/2-y, -1/2+z   |
| C2–H2···O5   | 0.93 | 2.53 | 3.368(3) | 151 | x, 1/2-y, -1/2+z   |
| C4–H4···O2   | 0.93 | 2.42 | 3.351(3) | 176 | 1-x, -y, 1-z       |
| C7–H7···O5   | 0.93 | 2.51 | 3.186(3) | 130 | 1+x, 1/2-y, -1/2+z |
| C10–H10···O4 | 0.93 | 2.55 | 3.290(3) | 137 | 1+x, y, z          |
| <b>4</b>     |      |      |          |     |                    |
| C2–H2···O5   | 0.93 | 2.55 | 3.375(5) | 148 | x, 1/2-y, 1/2+z    |
| C4–H4···O2   | 0.93 | 2.47 | 3.398(4) | 174 | 1-x, -1/2+y, 1/2-z |
| C7–H7···O5   | 0.93 | 2.49 | 3.201(5) | 133 | -1+x, 1/2-y, 1/2+z |
| C10–H10···O4 | 0.93 | 2.49 | 3.270(5) | 142 | -1+x, y, z         |

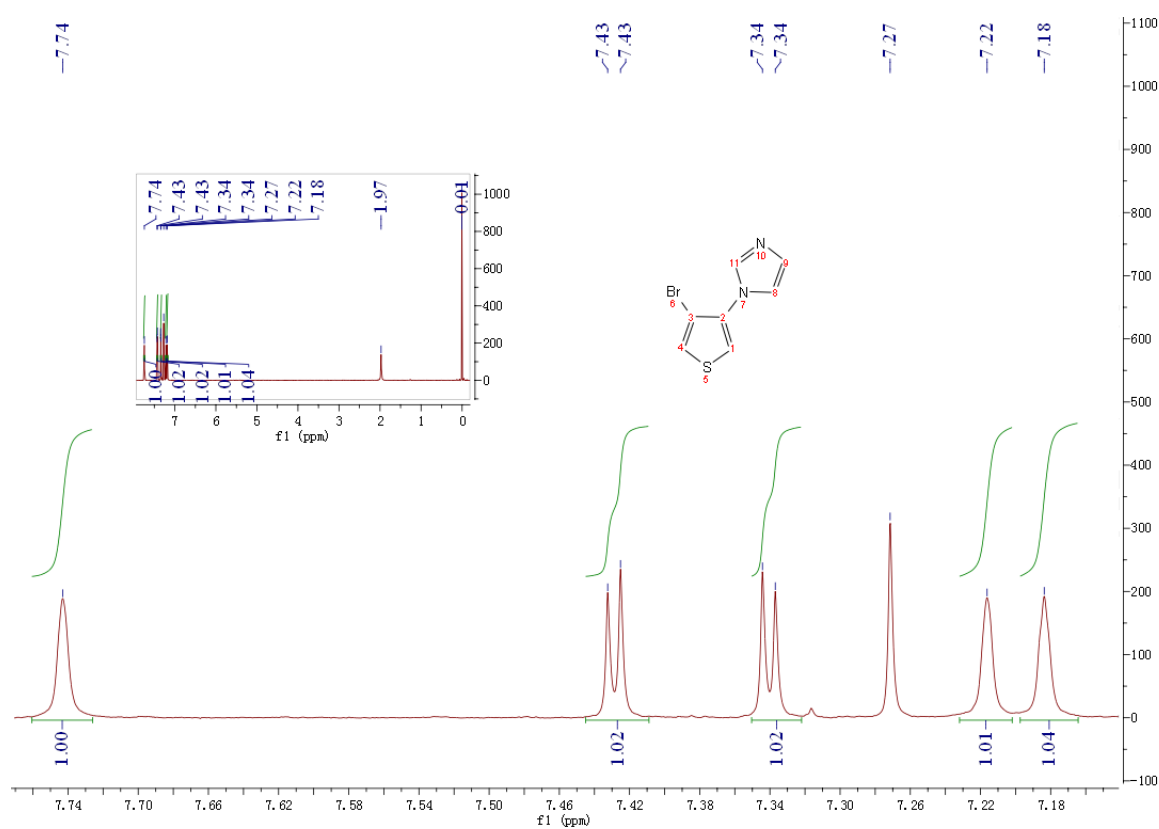

**Fig. S11.** <sup>1</sup>H NMR spectrum of compound L1.

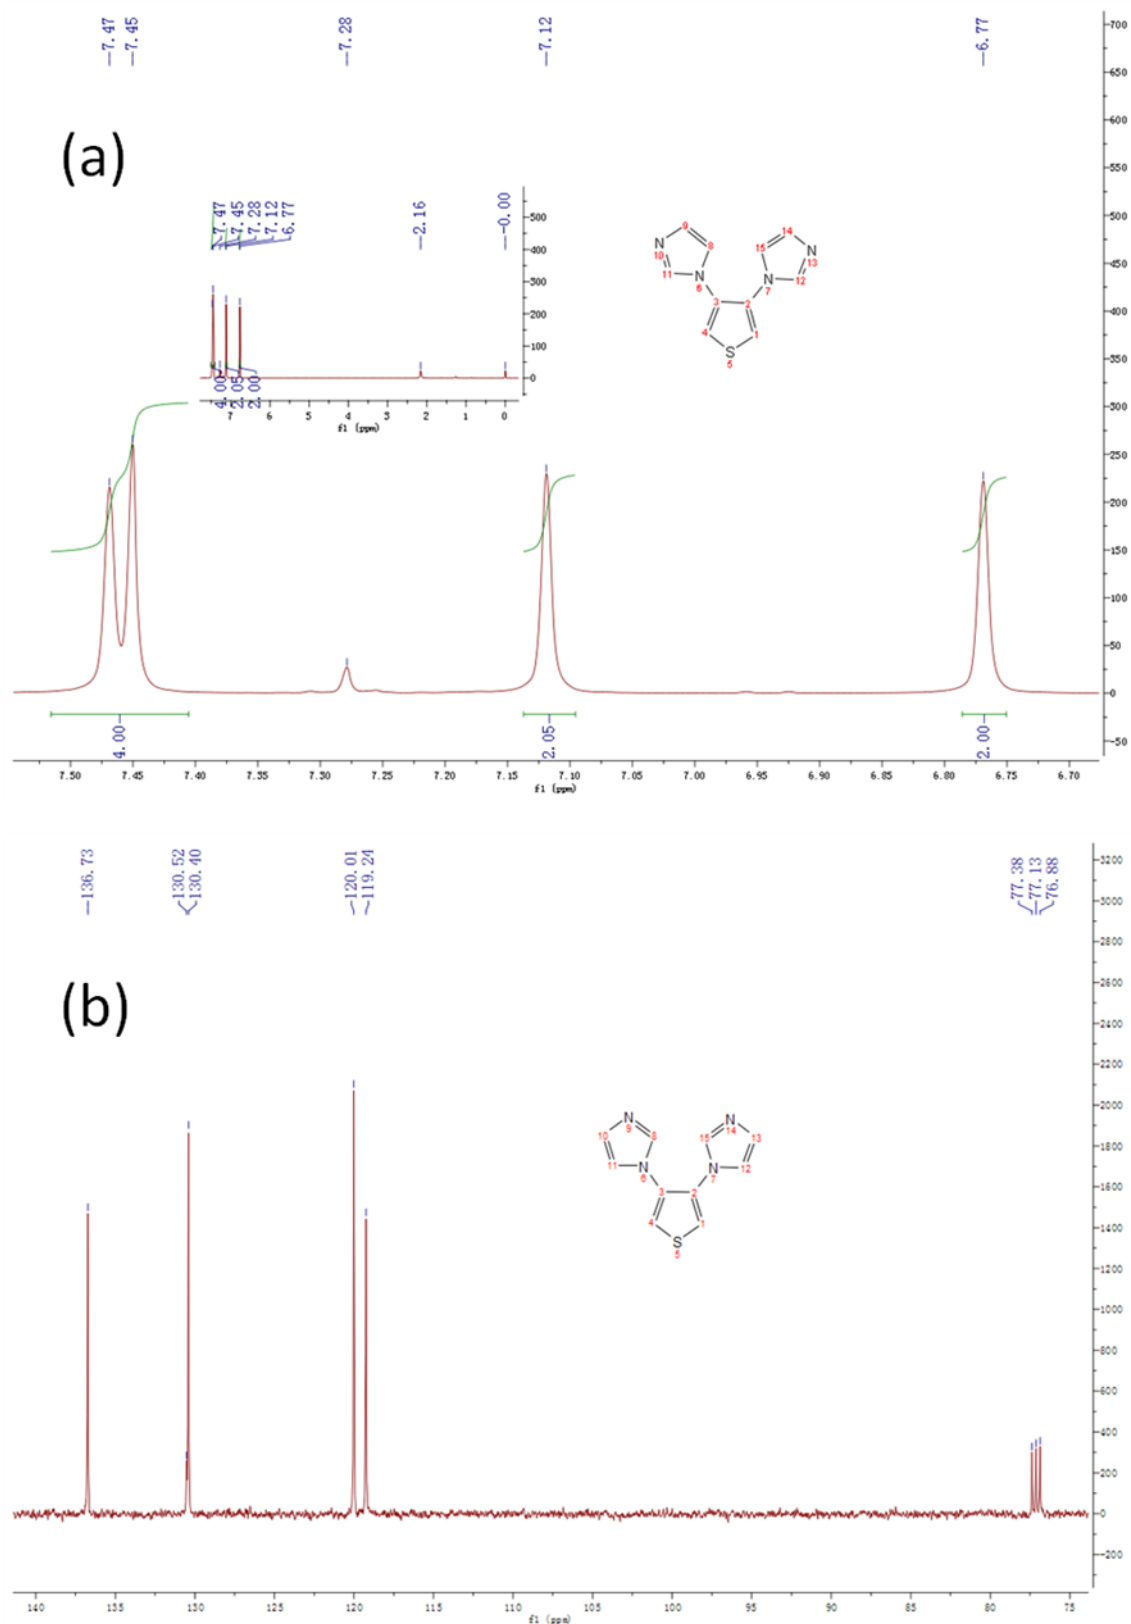

**Fig. SI2.**  $^1\text{H}$  (a) and  $^{13}\text{C}$  (b) NMR spectra of compound **Lsym**.

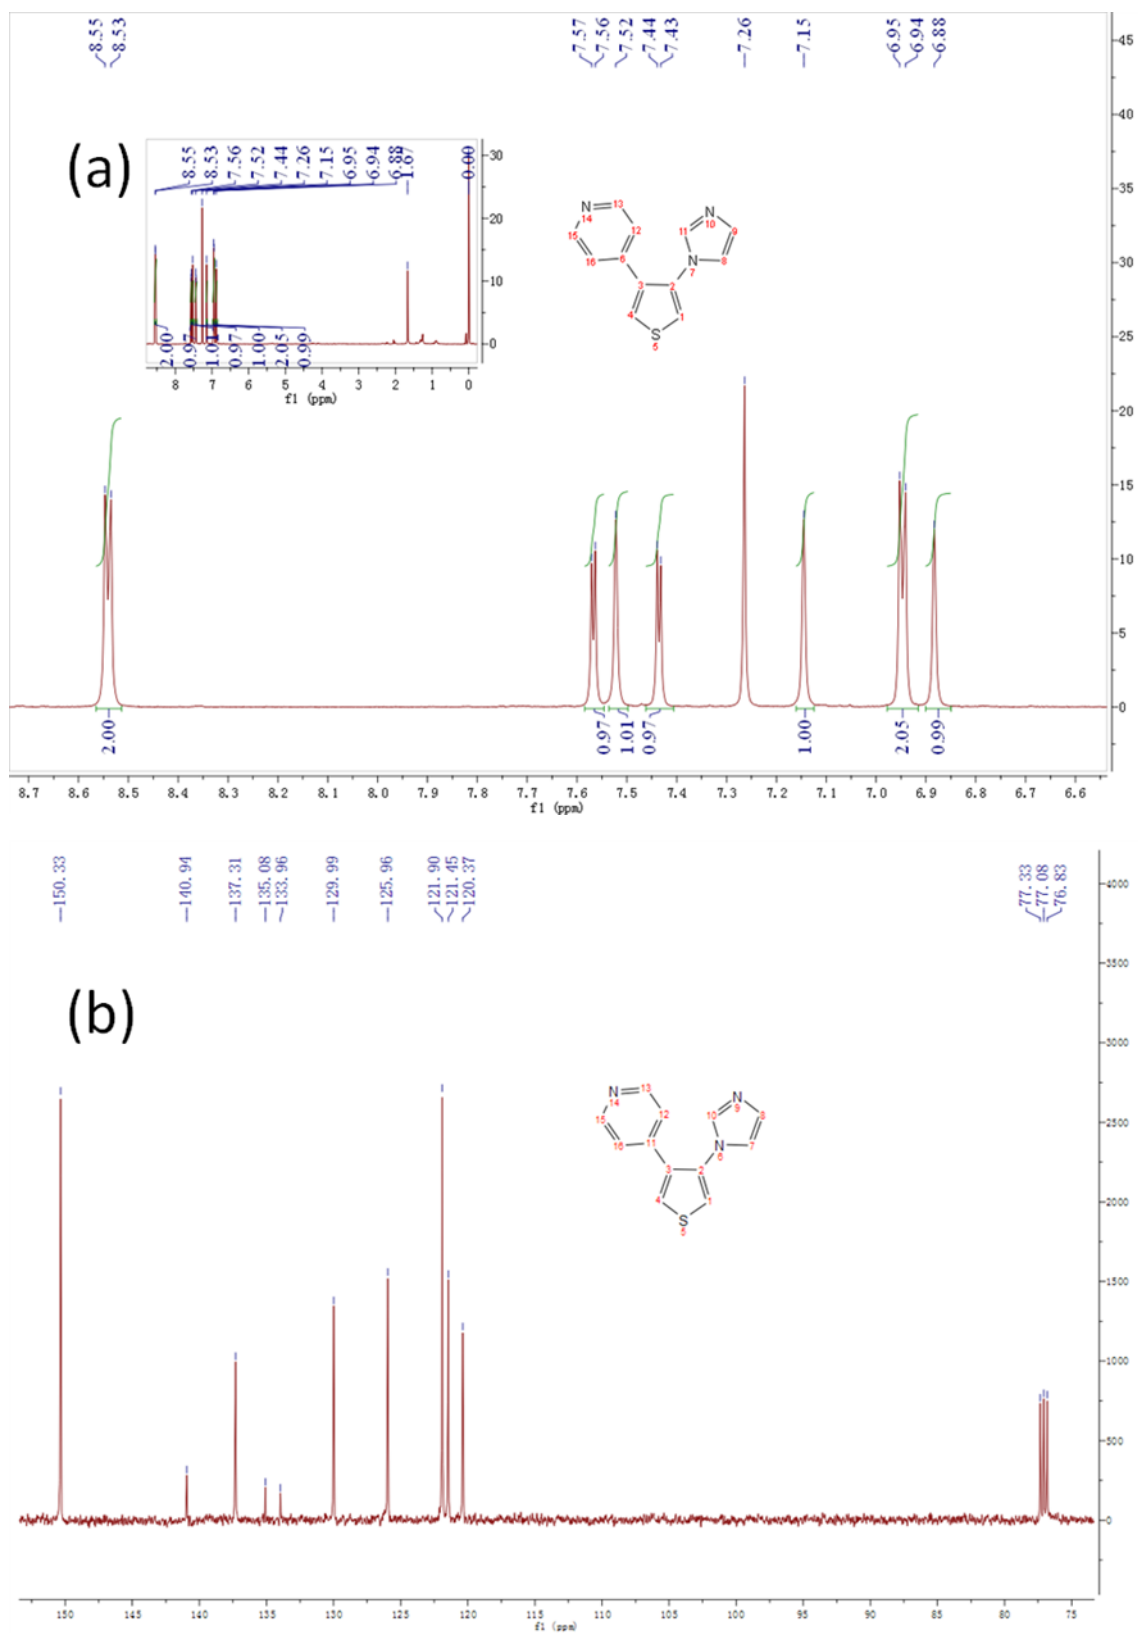

**Fig. SI3.**  $^1\text{H}$  (a) and  $^{13}\text{C}$  (b) NMR spectra of compound **Lasym**.

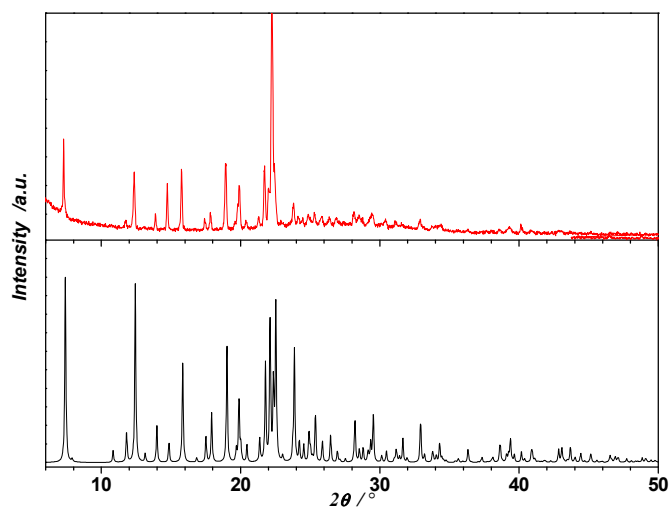

**Fig. SI4.** Diagrams of the simulative (black line) and experimental (red line) powder X-ray diffraction patterns for **1**.

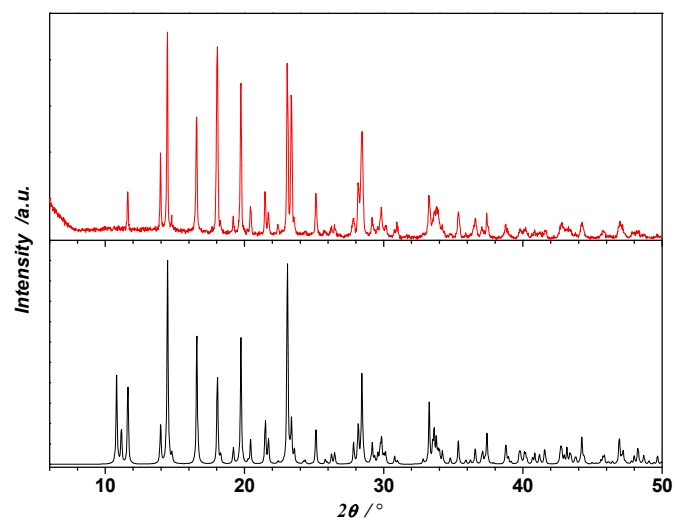

**Fig. SI5.** Diagrams of the simulative (black line) and experimental (red line) powder X-ray diffraction patterns for **2**.

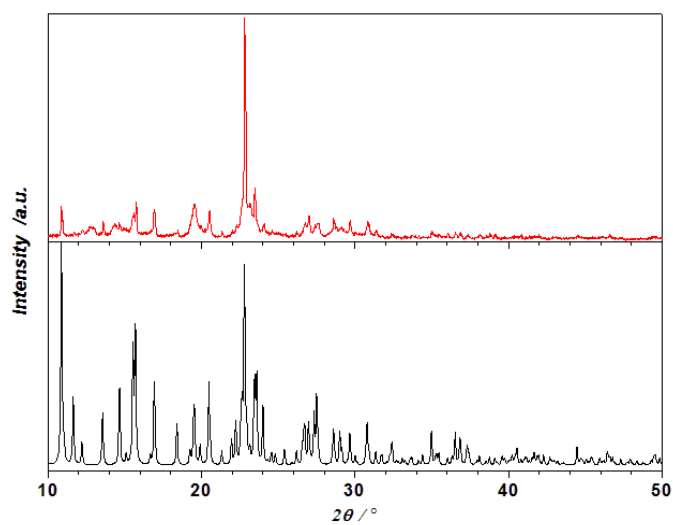

**Fig. SI6.** Diagrams of the simulative (black line) and experimental (red line) powder X-ray diffraction patterns for **3**.

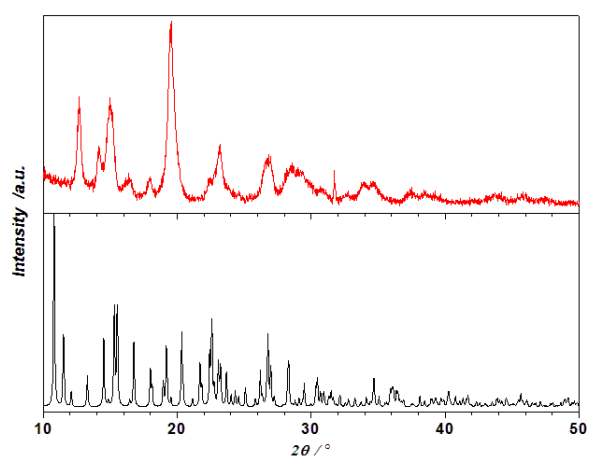

**Fig. SI7.** Diagrams of the simulative (black line) and experimental (red line) powder X-ray diffraction patterns for **4**.

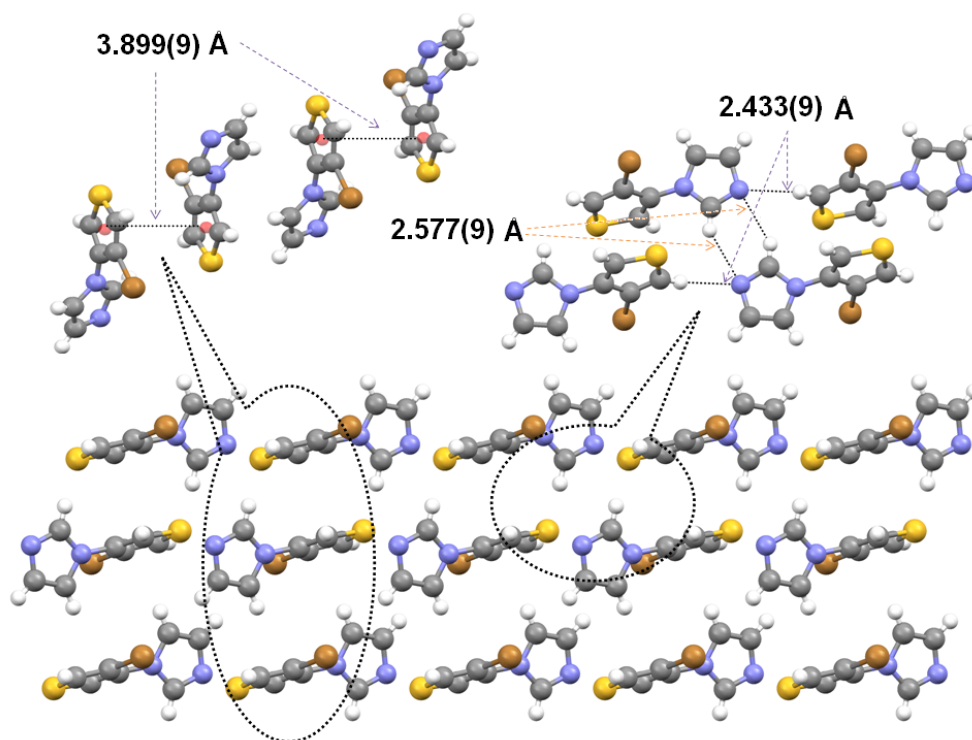

**Fig. S18.** View of the hydrogen bonding and  $\pi$ - $\pi$  stacking interactions in **L1**.
